# Supplementary material
Source: PubMed Central journal article supplement (PMC3157618)

A

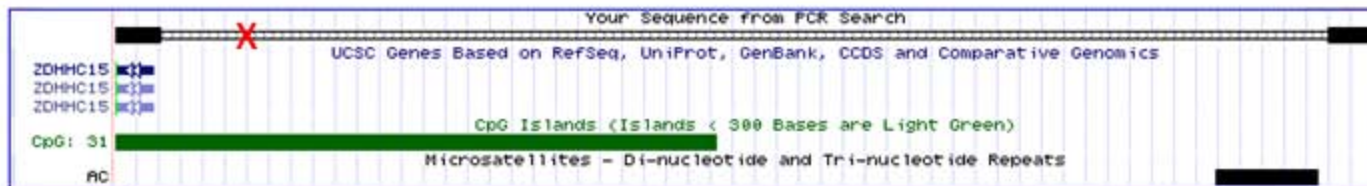

B

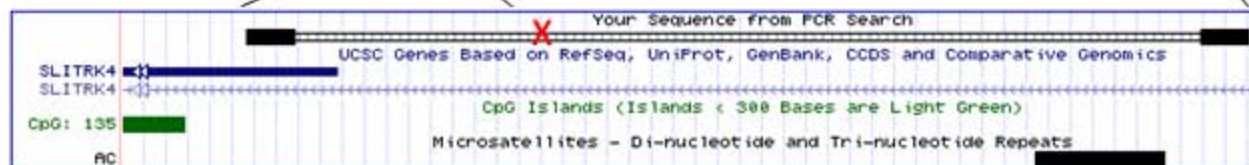

C

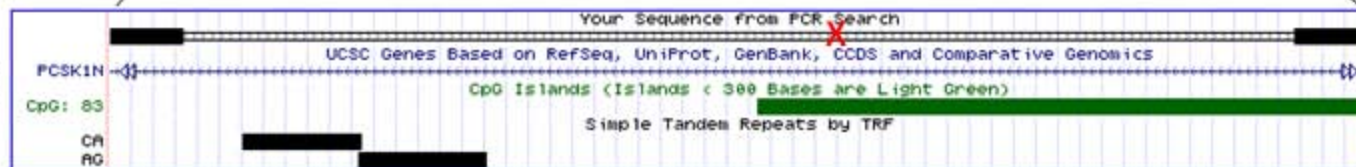

chrX

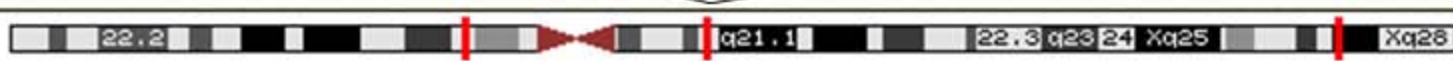

Supplement: mmc2.pdf [file mmc2.pdf]
